# Supplementary material for: Study on the long time aging behavior of MAPbI3: from experiment to first-principles simulation
Source: Royal Society of Chemistry journal article supplement (doi:10.1039/d2ra05378k), 2022-01-01
Supplement: d2ra05378k1.pdf [file d2ra05378k1.pdf]

Supporting Information for  
**Study on the long time aging behavior for MAPbI<sub>3</sub>: From  
experimental to first-principle simulation**

Yan Li<sup>a, e, \*</sup>, Yu-Jing Dong<sup>b, c</sup>, Hong He<sup>a</sup>, Xue-Lian Chen<sup>a</sup>, Hao Jiang<sup>a</sup>, Yu Jia<sup>b, d, \*</sup>

<sup>a</sup>*School of Materials Science and Engineering, Xi'an Shiyou University, Xi'an, 710065, China*

<sup>b</sup>*Key Laboratory for Special Functional Materials of Ministry of Education, and School of Materials, Center for Topological Functional Materials, and School of Physics and Electronic, Henan University, Kaifeng 475001, China*

<sup>c</sup>*School of Science and Technology, Xinyang College, Xinyang 464000, China*

<sup>d</sup>*International Laboratory for Quantum Functional Materials of Henan, and School of Physics, Zhengzhou University, Zhengzhou 450001, China*

<sup>e</sup>*State Key Laboratory for Mechanical Behavior of Materials, Xi'an Jiaotong University, Xi'an, 710065, China*

*E-mail address: yli@xsyu.edu.cn and jiayu@henu.edu.cn*

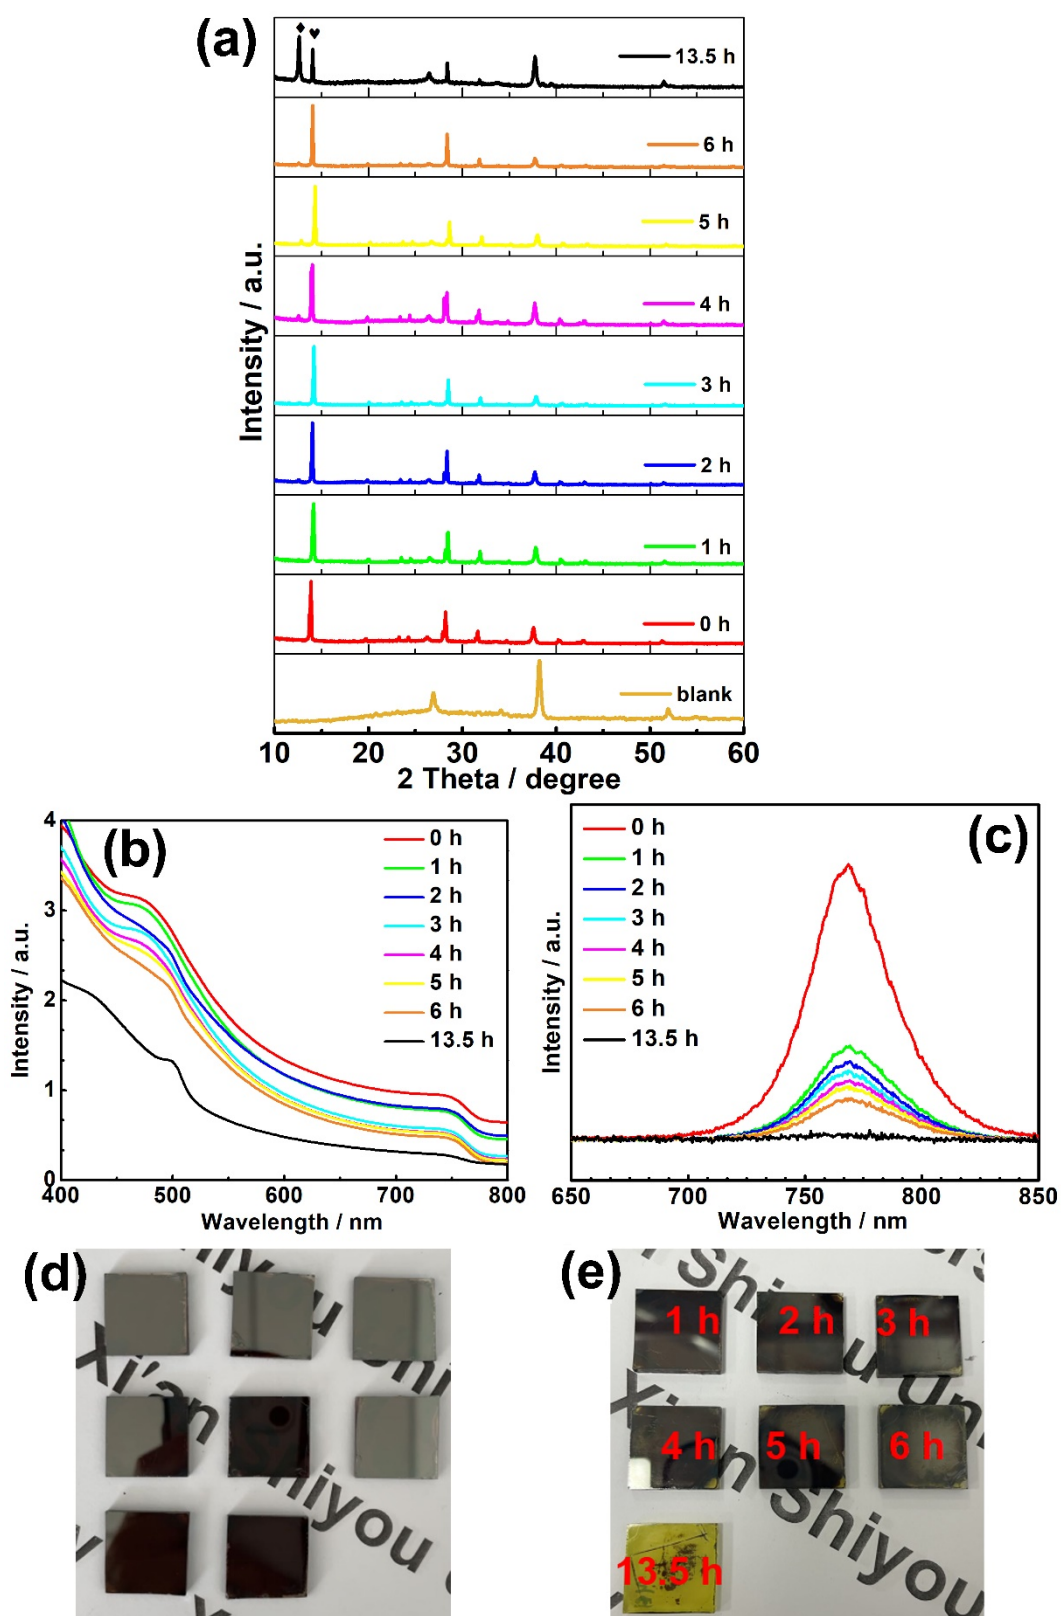

**Fig. S1** MAPbI<sub>3</sub> films aged by AM1.5 illumination in atmospheric environment: (a) XRD patterns, (b) UV-vis absorption spectra, (c) steady-state PL spectra and (d) photos before aging and (e) after aging for 6 hs, where ♥ is the (110) of MAPbI<sub>3</sub> and ♦ (001) of the PbI<sub>2</sub>

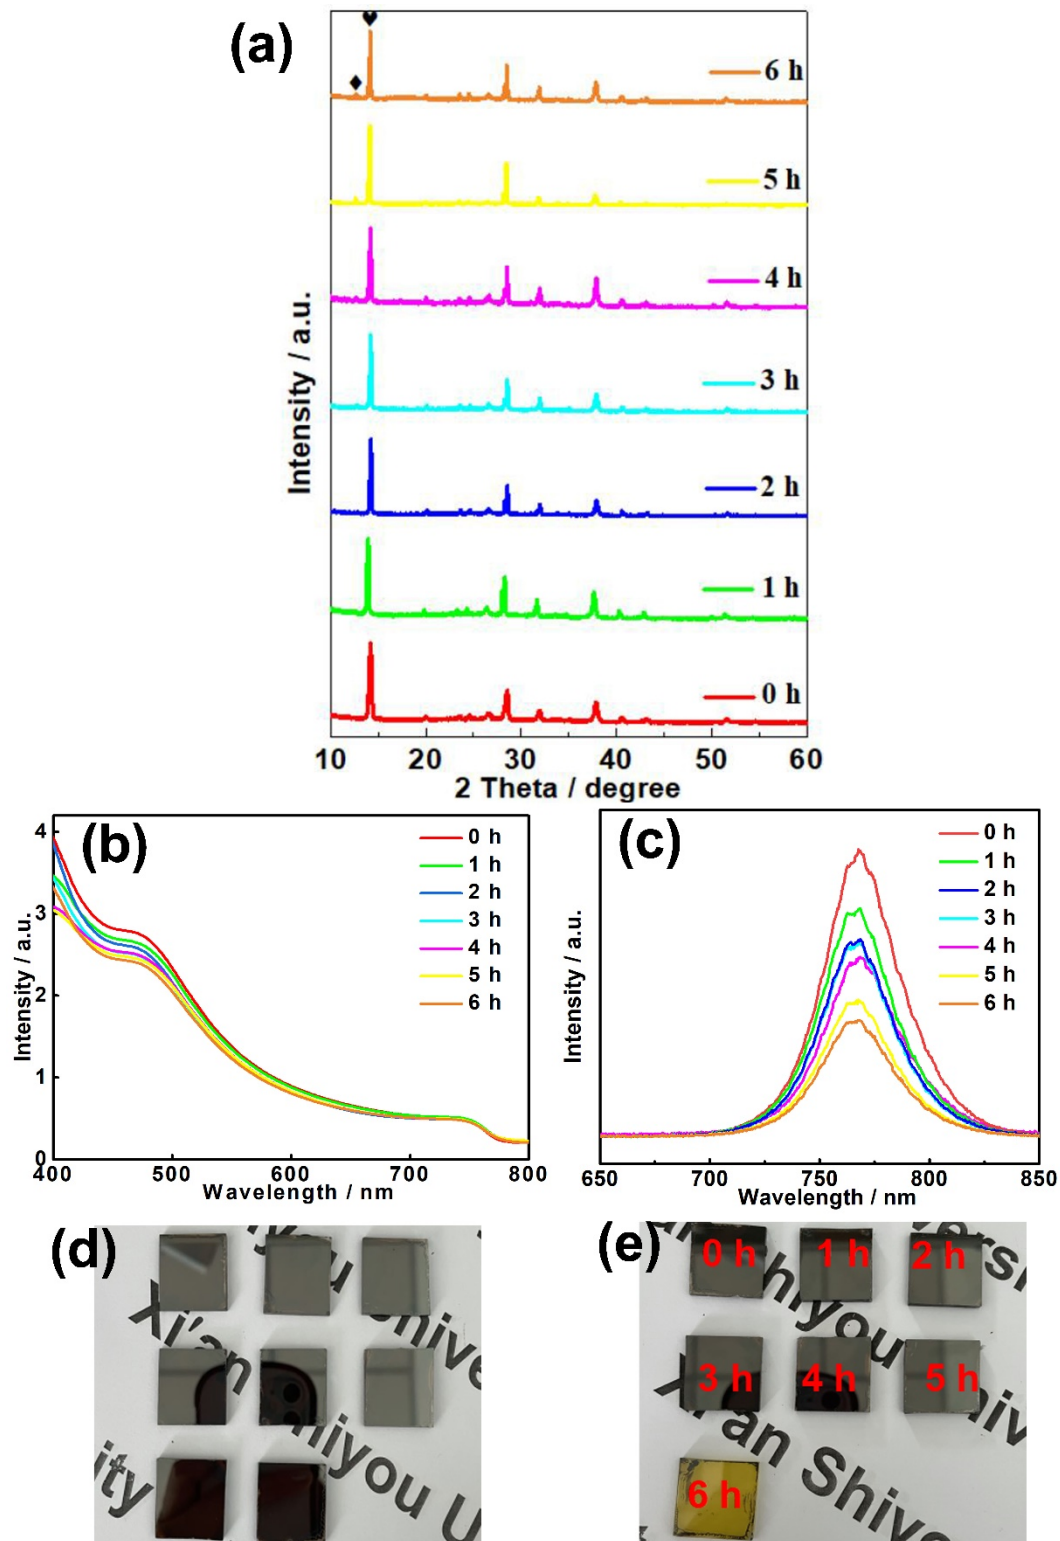

**Fig. S2** MAPbI<sub>3</sub> film aged by AM1.5 illumination at N<sub>2</sub> environment: (a) XRD patterns, (b) UV-vis absorption spectra, (c) steady-state PL spectra and (d) photos before aging and (e) after aging for 6 hs, where ♥ is the (110) of MAPbI<sub>3</sub> and ♦ (001) of the PbI<sub>2</sub>.

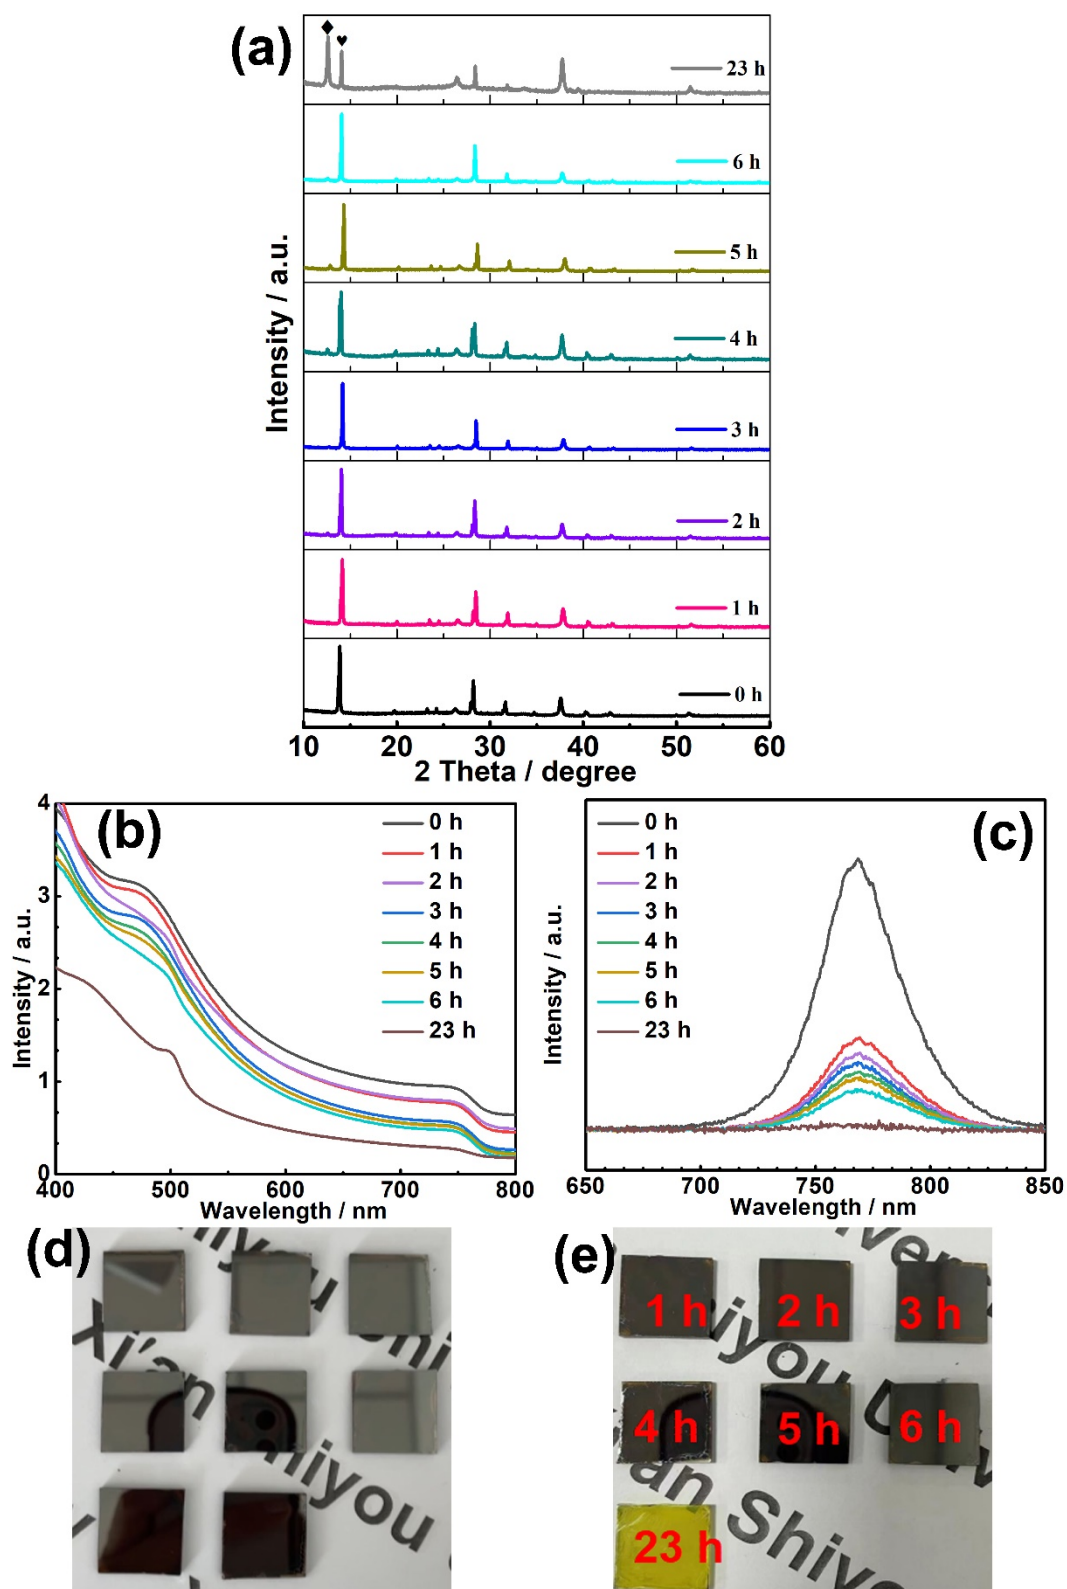

**Fig. S3** MAPbI<sub>3</sub> film aged by ultraviolet light in atmospheric environment: (a) XRD patterns, (b) UV-vis absorption spectra, (c) steady-state PL spectra and (d) photos before aging and (e) after aging for 6 hs, where ♥ is the (110) of MAPbI<sub>3</sub> and ♦ (001) of the PbI<sub>2</sub>.

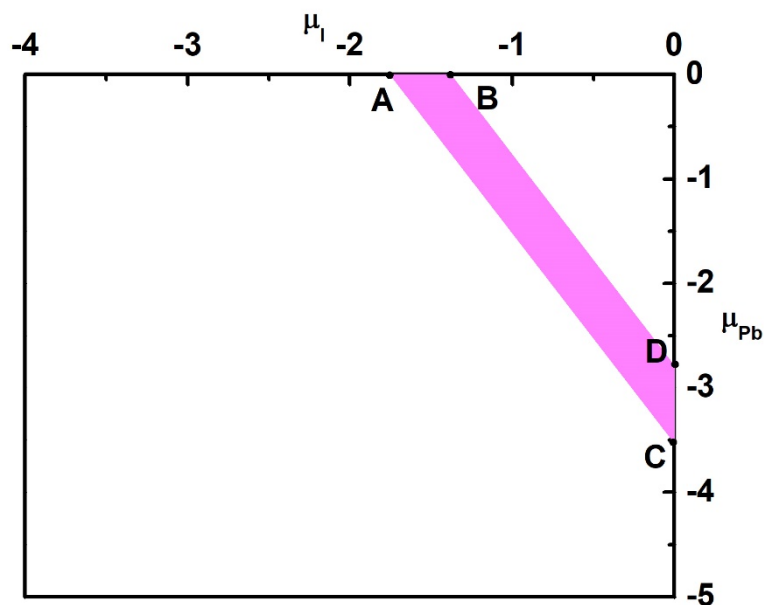

**Fig. S4** The phase diagram of the stable MAPbI<sub>3</sub>.

**Table. S1** The total energies of possible competitive phases.

| System                         | Energy (eV) | System                    | Energy (eV) |
|--------------------------------|-------------|---------------------------|-------------|
| I <sub>2</sub> (gas)           | -2.657      | C (graphite)              | -9.309      |
| Pb(metal)                      | -3.806      | N <sub>2</sub> (molecule) | -8.314      |
| MAI(solid phase)               | -42.797     | H <sub>2</sub> (molecule) | -3.383      |
| PbI <sub>2</sub> (solid phase) | -9.2539     | MA                        | -37.92      |
| MAPbI <sub>3</sub>             | -52.019     |                           |             |

**Table S2** The element chemical potential under different chemical conditions in the stable MAPbI<sub>3</sub> phase.

| I-poor/Pb-rich             | I-rich/Pb-poor             |
|----------------------------|----------------------------|
| <b>Point A</b>             | <b>Point C</b>             |
| $\mu_{\text{Pb}}=0$ eV     | $\mu_{\text{Pb}}=-3.52$ eV |
| $\mu_{\text{I}}=-1.76$ eV  | $\mu_{\text{I}}=0$ eV      |
| $\mu_{\text{MA}}=-1.03$ eV | $\mu_{\text{MA}}=-2.79$ eV |

In the calculated surface defect properties of MAPbI<sub>3</sub>, the defect formation energies and defect energy levels of different surface defects were calculated to

identify types of surface deep level defects. The types of surface defects include vacancies ( $V_{MA}$ ,  $V_{Pb}$ ,  $V_I$ ), interstitials ( $MA_i$ ,  $Pb_i$ ,  $I_i$ ) and anti-site substitutions ( $MA_I$ ,  $I_{MA}$ ,  $Pb_I$ ,  $I_{Pb}$ ,  $MA_{Pb}$ ,  $Pb_{MA}$ ,  $A_B$  means A on B site).

Defect formation energies were calculated by  $\Delta H = E_D - E_P - \sum_i n_i(\mu_i + \mu_j)$ . Where  $E_D$  and  $E_P$  are the energies of slab containing defect and perfect,  $n_i$  represents the lose atom (+) or surplus atom (-) number,  $\mu_i$  and  $\mu_j$  are their chemical potential, which can be expressed as  $\mu_i = \Delta\mu_i + \mu_i^{solid}$ ,  $\mu_i^{solid}$  is the chemical potential of the relevant elemental solid. The defect formation energy is related to the constituent element. The chemical potentials of different conditions and stable  $MAPbI_3$  without the formation of other competing phases can be obtained from the phase diagram meeting the following conditions

$$\mu_{MA} + \mu_I < \Delta H(MAI) = -3.55eV \quad \text{eqn.S1}$$

$$\mu_{Pb} + 2\mu_I < \Delta H(PbI_2) = -2.79eV \quad \text{eqn.S2}$$

$$\mu_{MA} + \mu_{Pb} + 3\mu_I = \Delta H(MAPbI_3) = -6.31eV \quad \text{eqn.S3}$$

$$\mu_{MA} < 0 \quad \text{eqn.S4}$$

$$\mu_{Pb} < 0 \quad \text{eqn.S5}$$

$$\mu_I < 0 \quad \text{eqn.S6}$$

Where  $\Delta\mu_{MA}$ ,  $\Delta\mu_{Pb}$ ,  $\Delta\mu_I$  are the chemical potentials of MA, Pb, I and Br, respectively,  $\Delta H(MAI)$ ,  $\Delta H(PbI_2)$  and  $\Delta H(MAPbI_3)$  are the formation enthalpies of MAI,  $PbI_2$  and  $MAPbI_3$ , respectively.
